# Supplementary material
Source: publisher site journal article supplement (https://www.spandidos-publications.com/20/downloadSupplementary)
Supplement: Supplementary file 1 [file downloadSupplementary]

## Sheet: Demographics
Table SΙ. Demographics of samples used in this study. The cohort group (cancer), age, sex, tumour site and histological and blood analysis results are listed.
Sample ID	Cohort group	Age	Sex	Weight [kg]	Height [cm]	Tumour Site	Histology	Pathology staging	Pre-op CRP level	Pre-op Bili	Pre-op ALT	Pre-op Alk Phos	Pre-op GGT	Pre-op Albumin	Pre-op Urea	Pre-op Creatinine	Pre-op estimated GFR	Pre-op Na	Pre-op K	Pre-op TCO2	Pre-op Glucose	Pre-op Hb	Pre-op PLT	Pre-op WCC	Blood testosterone	Blood calc free testosterone	Blood oestradiol	Blood LH	Blood FSH	Blood SHBG	Blood insulin	Blood cortisol
WEU0043	cancer	59	F	77.2	160	Oesophagus	SCC	T2N1	1	17	12	53	15	36	3.3	64	>60	138	3.8	23	5.1	114	183	4.3	1.8		<50	38.3	36.3	92		492
WEU0044	cancer	70	M	61.5	175	Oesophagus	ACC	T3N1	0.9	9	12	46	27	33	2.7	55	>60	134	3.7	23	5.1	116	257	5	12	183	<50	12.2	17.1	56	3.7	517
WEU0045	cancer	76	M	90.3	175.3	Oesophagus	ACC	T3N0	1	8	10	66	14	36	4.6	80	>60	138	4.3	20	5.3	134	207	7.4
WEU0046	cancer	54	M	86	180	Oesophagus	ACC	T3N1	3	4	11	56	24	38	3.8	69	>60	142	4.5	18		115	230	9.2	12.7	257	72	12.3	15.8	36	8	210
WEU0047	cancer	70	M	79.5	180	Oesophagus	ACC	T3N1	2	8	28	78	30	37	4.2	99	>60	140	4.7	29		142	218	10.2	23.1	374	101	16.9	16.7	57	8.4	315
WEU0048	cancer	55	M	101.5	176.5	OGJ	ACC	T3N1	2	6	11	39	32	36	6.4	108	>60	141	4.6	20		131	203	3.4	11.2	228	64	2.9	5.8	36		401
WEU0049	cancer	62	M	102.7	191	OGJ	ACC	T3N1	2	16	11	53	19	30	3.9	95	>60	139	3.7	25	5.7	128	204	7.9
WEU0050	cancer	69	M	67.2	167	Pancreas	ACC	mets	6	9	106	142	342	35	3.7	81	>60	139	4	23	5.1	141	225	10.3	8.5	199	53	8.4	5.4	28	6.5	329
WEU0051	cancer	74	M	84	165	Pancreas	Unconfirmed		5	14	24	99	99	41	5.7	92	>60	137	4.5	22	9.1	149	325	7.5	6.1		82	4.7	8.1	36	6.3	530
WEU0052	cancer	58	M	83	177.8	OGJ	ACC	T3N0	1	8	13	65	20	37	6.1	77	>60	139	4.3	25		134	288	8.9
WEU0053	cancer	65	M	87	172	Gastric	ACC	T2aN0	1	4	19	37	24	28	3.2	70	>60	136	4.3	24		129	154	8.8
WEU0054	cancer	69	M	78	173	Gastric	ACC	T3N2	3	9	32	91	39	37	8.4	99	>60	142	4.3	20		143	265	7.8	12.2	273	63	11.5	18.5	31	2.9	274
WEU0056	cancer	64	M	86.6	167.6	Gastric	ACC	T2aN0	6	9	28	103	106	31	6	97	>60	138	3.6	24	4.5	164	362	6.5	21.1	386	94	3.2	3.7	52	10	345
WEU0057	cancer	70	M	82	175	OGJ	ACC	T2bN0	2	5	19	54	52	40	7.5	95	>60	141	4.6	21		119	321	8.1	10.3	195	<50			37	7.8	397
WEU0058	cancer	83	M	58.5	162	Oesophagus	ACC	T2N0	1	10	12	54	16	37	6.7	93	>60	134	3.9	23	5.4	84	362	10.8	8.2	176	<50	12	33.9	31	5.7	527
WEU0059	cancer	72	M	84.5	189.5	OGJ	mixed ACC/neuroendocrine	T3N3	10	13	14	59	56	42	5.6	114	>60	142	4.5	26	6	151	284	8.1	11.7		157	1.8	3.1	30	8	473
WEU0060	cancer	80	M	67.4	172	Oesophagus	ACC	T3N1	22	4	19	82	53	36	7.8	87	>60	137	3.6	29	4.8	122	288	7.3	10	164	<50	6.6	10.2	48		486
WEU0061	cancer	69	M	102.06	175.26	OGJ	ACC	T2aN1	10	9	37	114	35	40	7	94	>60	138	4.5	23	4.2	113	238	6.4	13.7	151	63	9.4	12.6	79	3.8	275
WEU0062	cancer	76	F	75	156.2	Gastric	ACC	T3N1	79	4	19	35	45	30	11	132	38	142	4	22	5	91	404	9.3	1		50	23	54.4	34	10	396
WEU0063	cancer	66	M	94.7	176.5	Oesophagus	ACC	T1N0	1	5	18	85	42	36	4.3	64	>60	139	3.6	25	5.7	151	252	6.2
WEU0064	cancer	76	M	80.6	182.9	Gastric	ACC	T2bN1	8	5	13	87	25	34	4.1	85	>60	135	4.2	23	6.2	114(post t)	462	8.6	11.4	207	60	5.1	5.3	44	7.3	359
WEU0065	cancer	68	M	68.6	182	Pancreas	ACC	mets	172	16	29	97	20	28	6.4	67	>60	126	3.1	21	4.8	96	373	7.9	3.2	69	145	6.3	3.3	33	4.3	593
WEU0066	cancer	65	M	83	172	Pancreas	ACC	mets	48	11	10	65	209	34	4.7	76		138	4	26		142	282	9.5
WEU0067	cancer	75	M	79.8	175	Pancreas	Unconfirmed	mets	30	33	359	203	421	32	7.5	157	40	142	3.8	24	5.6	155	232	5.3
WEU0068	cancer	75	F	57.6	158.5	Gastric	ACC	T2bN0	5	5	13	83	23	46	7.3	108	49	140	4.6	23	6.1	136	366	11.5
WEU0069	cancer	82	M	77.6	173.5	Oesophagus	ACC	T3	1	10	17	49	18	34	7.4	83	>60	140	4.4	28	5	135	175	6.2	14.3	188	80	8.4	11.3	68	5	305
WEU0070	cancer	52	M	67	162	Oesophagus	ACC	in situ	1	12	21	50	36	37	2.7	74	>60	135	3.8	25	4.9	145	324	7.3	18.3	429	201	2.4	6.2	32	6.8	385
WEU0071	cancer	65	M	90.6	170	OGJ	ACC	T3N1	1	8	10	82	11	38	4.9	68	>60	141	4	23	9.1	116	276	6.3	1.2		<60	21	62.2	70	7.5	559
WEU0072	cancer	68	F	60.8	154	OGJ	ACC	T2bN0	1	13	15	65	10	35	5.1	70	>60	141	3.8	22		118	229	8.9	2.7		<50	16.3	55.4	76	9.3	234
WEU0073	cancer	70	M	80	180	Gastric	ACC	T2bN2	9	8	9	77	12	30	4.9	100	>60	140	4.1	24		102	247	8.1	6.5	140	52	0.9	2.9	34		264
WEU0074	cancer	52	M	98.4	180.34	Pancreas	ACC	T2N0	2	12	28	39	22	36	6.3	85	>60	143	3.6	23	8.5	139	286	10.7	4.4	123	50	4.9	2.6	18	4.7	361
WEU0075	cancer	75	M	67.8	166	Oesophagus	ACC	T3N0	1	13	10	48	11	35	7.4	126	54	142	4	27		107	189	7.8	11.6	223	<60	6.8	4.3	40		667
WEU0076	cancer	45	M	69.4	180	OGJ	ACC	T3N0	1	10	18	84	78	38	2.8	62	>60	137	3.5	25	5.7	107	218	3.9	25.1		120	11.7	18.1	82	4.1	323
WEU0077	cancer	52	M	75.7	167	Pancreas	ACC	T3N1	7	31	143	178	34	35	4.5	87	>60	141	4.1	21	5	148	267	9.6	14	342	81	5.9	4.1	29	7	543
WEU0078	cancer	62	F	73.03	170.18	Pancreas	ACC	T3N0	4	338	59	532	99	33	3.1	78	>60	137	2.7	21	7.7	124	290	7.3	1.2		117	14.8	37.2	66	3.7	510
WEU0079	cancer	65	M	76.8	177.5	Pancreas	ACC	mets	7	48	129	261	544	38	4.9	67	>60	134	4.1	24		119	321	5.5	3.5		<50	5	3	74	3	527
WEU0080	cancer	81	M	68.1	182.9	Gastric	ACC		5
WEU0081	cancer	61	M	90	189.2	Gastric	ACC		47
WEU0082	cancer	74	M	50.3	177.8	Oesophagus	SCC
WEU0083	cancer	48	M	42.5	162.6	Oesophagus	SCC		5
WEU0084	cancer	75	F	48.7	148.6	Gastric	ACC		40
WEU0085	cancer	82	F	54.1	162.6	Oesophagus	ACC		6
WEU0086	cancer	54	M	88.9	188	Oesophagus	ACC		5
WEU0087	cancer	66	F	39.6	160	Oesophagus	SCC		5
WEU0088	cancer	75	M	79	180	Oesophagus	ACC	T3N1	2	10	18	128	25	38	5.1	76	>60	138	4	25	4.3	127	152	3.1	21.9		94	17.1	26.1	168	4.1	427
WEU0089	cancer	67	F	61	171.5	Pancreas	ACC	T3N1	38	16	154	261	99	35	2.8	61	>60	138	4	21	5.9	145	10.2	344	1.1		54	16.6	37.1	58	3.9	925
WEU0090	cancer	67	M	76.6	179.5	Pancreas	ACC	T3N1	18	15	50	397	1020	37	3.4	78	>60	142	3.6	26	5	118	247	7.4	8.2	121	77	3.9	3.4	53	2.5	374
WEU0091	cancer	75	F	48.8	156	Pancreas	ACC		5	14	29	310	768	26	4.3	58	>60	133	3.6	20	5.2	121	409	9.1	0.5		<60	9.8	33.8		2.4	156
WEU0092	cancer	62	F	64.5	160	Gastric	ACC	T3N2	1	9	23	81	13	33	3.6	59	>60	141	3.9	19	5.5	110	419	8.7	0.8		<50	34.9	66.2		13.2	350
WEU0093	cancer	65	M	78.5	173	OGJ	ACC	T2bN1	1	14	8	90	19	36	4.7	91	>60	142	3.7	25		117	208	5.6	16.4	222	94	13.1	19	66	6.1	262
WEU0094	cancer	73	M	60.2	169.5	Gastric	ACC	T3N2	0.9		12	66	7	30	7.5	78	>60	141	3.8	23		112	217	5	10.4	145	76	21.3	8	63	<2.0	290
WEU0095	cancer	55	F	49.9	156	Pancreas	ACC + papillary mucinous	T2N0	145	5	22	175	134	30	4.1	68	>60	140	4.1	21	7.3	93	634	8.2	0.6		110	18.5	18.3	36	2.3	402
WEU0096	cancer	72	M	71.2	172	Pancreas	ACC	T2N1	18	52	34	185	126	22	5.4	109	>60	143	3.6	22	6.3	109	287	5.9
WEU0097	cancer	62	F	57	157	Oesophagus	SCC	T3N0	9	4	20	113	48	32	2.7	56	>60	142	3.6	24		123	255	6.8	1.5		<50	21.5	47.3	79	16.3	210
WEU0098	cancer	54	M	94.8	172	OGJ	ACC	T4N1	2	5	20	99	23	37	5.4	80	>60	140	4.4	24	5.3	154	203	4.2	22.9	273	60	9.4	13.8	81	15.4	707
WEU0099	cancer	65	F	73	164	Gastric	ACC	T2bN2	5	7	28	59	46	34	3.2	78	>60	138	4.2	23	6	141	288	10.9	1.1		<50	21.8	49	34		196
WEU0100	cancer	61	M	74.4	175	Oesophagus	SCC	T3N0	13	8	13	109	15	35	4.6	68	>60	135	3.8	24	4.6	123	319	5.8
WEU0101	cancer	71	F	48.5	170.2	Pancreas	ACC	T3N1	8	5	21	262	389	29	9.9	84	>60	138	4	22		108	731	11.1	1		<50	20.9	53.1	48	4.2	413
WEU0103	cancer	52	M	84.2	170	OGJ	ACC	T3N1	4	7	15	77	14	34	4.5	91	>60	135	4	23	5.5	118	276	10.1	14.1		54	9.7	6.3		6.3	306
WEU0104	cancer	69	F	52.5	160	Pancreas	ACC	mets	2	6	14	145	93	33	4.8	64	>60	137	3.5	26	16.2	137	331	7.1
WEU0105	cancer	65	M	59.9	172.7	Pancreas	ACC		1	342	39	175	73	27	5.8	89	>60	137	2.9	25	7.2	107	253	4.8	5.9	106	165	11.2	3	45	<2.0	582
WEU0106	cancer	58	M	54.6	162	Pancreas	ACC		50	134	84	763	574	27	2.5	66	>60	134	3.6	23	7.9	117	219	5.6	5.6	86	66	4.9	1.6	54	<2.0	411
WEU0107	cancer	66	F	48.9	160	Pancreas	ACC		119	6	25	131	24	34	5	61	>60	140	4.4	20	5.7	118	275	8.9	1.4		71	39.2	45.8	40	3.1	421
WEU0108	cancer	79	F	41.4	140	Gastric	ACC	T4N2	2	5	6	24	6	30	7.7	81	>60	141	3.8	22	4.8	131	222	7.8	0.9		<60			64	5.6	262
WEU0109	cancer	44	F	53.6	157	Pancreas	Unconfirmed		59	40	38	997	943	22	1.9	39	>60	136	3.9	22		87	665	16.7	0.7		67	1.1	1.1	62	3.2	474
WEU0110	cancer	48	F	75	162	Pancreas	ACC	mets	7	3	40	463	506	33	3.4	59	>60	139	3.7	23	31.6	121	523	11.9
WEU0111	cancer	68	M	73.9	169	Oesophagus	ACC	T3N1	3	6	13	39	17	33	5.7	68	>60	141	3.9	22	5.2	131	342	12.3	14.9	228	144	10.9	18.4	58	10.2	627
WEU0112	cancer	74	M	86	170	Oesophagus	SCC	T3N0	14	5	12	103	39	36	5.4	63	>60	139	4.2	24	7.7	118	251	5.2	17.7	263	97	18.6	22.6	60	5.7	440
WEU0113	cancer	61	M	89.1	173	Oesophagus	ACC	T3N1	1	5	15	51	37	37	6.4	78	>60	138	4.1	21	6.6	128	223	5.1	12.4	235	<50	21.5	38.4	40	28.6	265
WEU0114	cancer	66	M	133	177	Oesophagus	ACC	T3N1	4	8	30	62	77	38	12	149	41	144	5.1	20	5.8	119	258	4.4	11.5	210	103	11.4	15.8	41	31.2	775
WEU0115	cancer	59	M	94	188	Gastric	ACC		1	9	14	79	23	35	5.4	58	>60	138	4.1	25	11.1	127	223	4.9	16	202	55	10.3	18	72	16.9	287
WEU0116	cancer	43	M	121.7	174.5	Oesophagus	ACC	T3N1	3	7	44	51	213	40	6.2	77	>60	140	3.5	21	5.3	141	218	4.8	12.5	270	128	2.9	5.3	31	18.2	498
WEU0117	cancer	75	M	65.3	170	Oesophagus	ACC	T3N0	3	7	10	79	18	32	10.1	71	>60	139	3.7	22	4.2	102	469	14.4	13.4	149	85	5	6	83	2	229
WEU0118	cancer	70	M	105.5	178.5	Pancreas			28	84	120	595	685	34	7.2	80	>60	137	4.3	19	9.8	144	380	8.1	9.5	148	110	6.3	3.4	52	11.2	510
WEU0119	cancer	44	F	65	168.5	Pancreas			3	4	17	46	9	28	1.2	47	>60	140	3.4	22	7.8	122	279	6.4	0.5		108	2.9	11.8	55	2.2	116
WEU0120	cancer	59	F	56.4	166	Pancreas			36	119	241	729	461	36	3.6	49	>60	136	3.3	22	5.5	126	368	5.7	1.1		<50	35.8	30.2	53	5.6	552
WEU0121	cancer	59	M	92.4	174	Pancreas			1	21	32	80	55	34	6.4	123	52	139	3.6	18	16.1	107	413	7.3	8.8	129	80	19	37.2	56	12.7	539
WEU0122	cancer	63	F	52.4	153	Pancreas			1	38	22	104	30	32	3.5	46	>60	140	3.9	23	5.8	141	209	5.2	1.6		<50	22.9	65.8	63	<2.0	320
WEU0123	cancer	67	M	91.3	170	Pancreas			1	10	28	74	20	38	3.1	57	>60	142	3.3	23		152	291	7.7	12.5	197	73	8.7	6.9	51	6.4	260
WEU0184	cancer	76	M	72.4	172.5	Pancreas		met	4	14	13	34	308	30	5	64	>60	140	4.4	25	5.7	126	211	6.3	26.8	158	68	31.9	18.6	177	<2.0	369
WEU0188	cancer	65	M	90.6	170	OGJ	ACC	T3N1	1	8	10	82	11	38	4.9	68	>60	141	4	23	9.1	116	276	6.3	1.2		<60	21	62.2	70	7.5	559
WEU0194	cancer	63	F	71.8	175	Oesophagus	SCC	T3N1	5	13	9	85	38	35	3.3	51	>60	138	3.2	22	x	122	192	7.6	1.4		<50	20.7	28.4	116	6.1	788
WEU0197	cancer	56	M	59.8	173	Oesophagus			85
